# Supplementary material for: ICSI versus Conventional IVF in Women Aged 40 Years or More and Unexplained Infertility: A Retrospective Evaluation of 685 Cycles with Propensity Score Model
Source: PubMed Central journal article supplement (PMC6833057; doi:10.3390/jcm8101694), 2019-10-16
Supplement: jcm-08-01694-s001.pdf [file jcm-08-01694-s001.pdf]

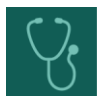

**Table S1.** Basal characteristics of the patients with no previous treatments in the two study groups.

|                               | cIVF ( <i>n</i> = 217) | ICSI ( <i>n</i> = 169) | <i>p</i> |
|-------------------------------|------------------------|------------------------|----------|
| Woman age (years)             | 41 ± 0.8               | 41 ± 0.8               | 0.8825   |
| Years of infertility          | 2.6 ± 2.0              | 3.1 ± 2.5              | 0.0224   |
| BMI (Kg/m <sup>2</sup> )      | 22.7 ± 3.4             | 23.2 ± 4.1             | 0.5206   |
| AFC                           | 9.7 ± 5.6              | 10.5 ± 6.1             | 0.2100   |
| AMH (ng/mL)                   | 1.6 ± 1.8              | 1.5 ± 1.4              | 0.6336   |
| Women who smoke               | 27 (12.4%)             | 24 (14.2%)             | 0.6127   |
| Partner's age (years)         | 41.9 ± 5               | 43 ± 5                 | 0.1772   |
| Sperm concentration (Mln/mL)  | 81 ± 33.3              | 75.2 ± 35.8            | 0.1029   |
| Progressive motility (A+B; %) | 40.6 ± 4.9             | 39.9 ± 4.3             | 0.0849   |
| Normal morphology (%)         | 5.0 ± 0.8              | 5 ± 0.8                | 0.6329   |

BMI, body mass index; AFC, antral follicular count; AMH, anti-Mullerian hormone; cIVF, conventional in vitro fertilization; ICSI, Intracytoplasmic sperm injection.
